# Supplementary material for: Alignment control and atomically-scaled heteroepitaxial interface study of GaN nanowires
Source: Royal Society of Chemistry journal article supplement (doi:10.1039/c7nr00032d), 2017-01-01
Supplement: c7nr00032d1.pdf [file c7nr00032d1.pdf]

## Supplementary information

### Alignment control and atomically-scaled heteroepitaxial interface study of GaN nanowires

*Qingyun Liu,<sup>1</sup> Baodan Liu,<sup>1,\*</sup> Wenjin Yang,<sup>1</sup> Bing Yang,<sup>1</sup> Xinglai Zhang,<sup>1</sup> Christophe Labbé,<sup>2</sup> Xavier Portier<sup>2</sup>, Changmin Xiong,<sup>3,\*</sup> Vladimir An,<sup>4</sup> Xin Jiang<sup>1,\*</sup>*

<sup>1</sup>Shenyang National Laboratory for Materials Science (SYNL), Institute of Metal Research (IMR), Chinese Academy of Sciences (CAS), No. 72 Wenhua Road, Shenyang 110016 China

<sup>2</sup>CIMAP CNRS/CEA/ENSICAEN/Normandie University 6 Bd Maréchal Juin, 14050 Caen Cedex 4, France

<sup>3</sup>Department of Physics, Beijing Normal University, 100875, Beijing, P. R. China

<sup>4</sup>Institute of High Technology Physics, National Research Tomsk Polytechnic University, 30 Lenin Ave., 634050 Tomsk, Russia

Email: [baodanliu@hotmail.com](mailto:baodanliu@hotmail.com)

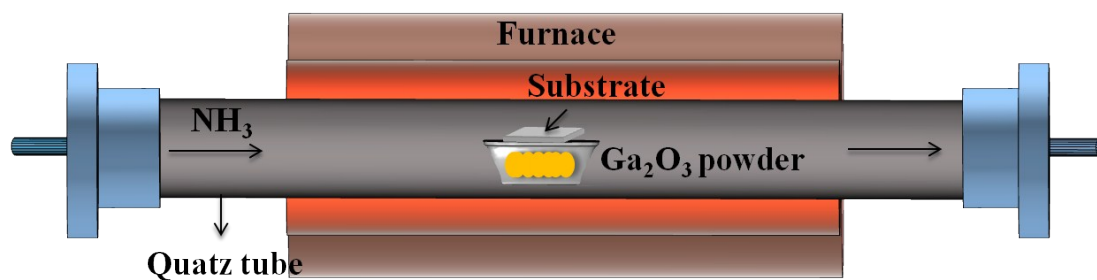

**Figure S1.** Schematic diagram of the experimental set-up for the epitaxial growth of aligned GaN nanowires; An alumina boat loaded with Ga<sub>2</sub>O<sub>3</sub> powder is placed in the middle of the horizontal quartz tube and a piece of sapphire substrate is placed upon the alumina boat.

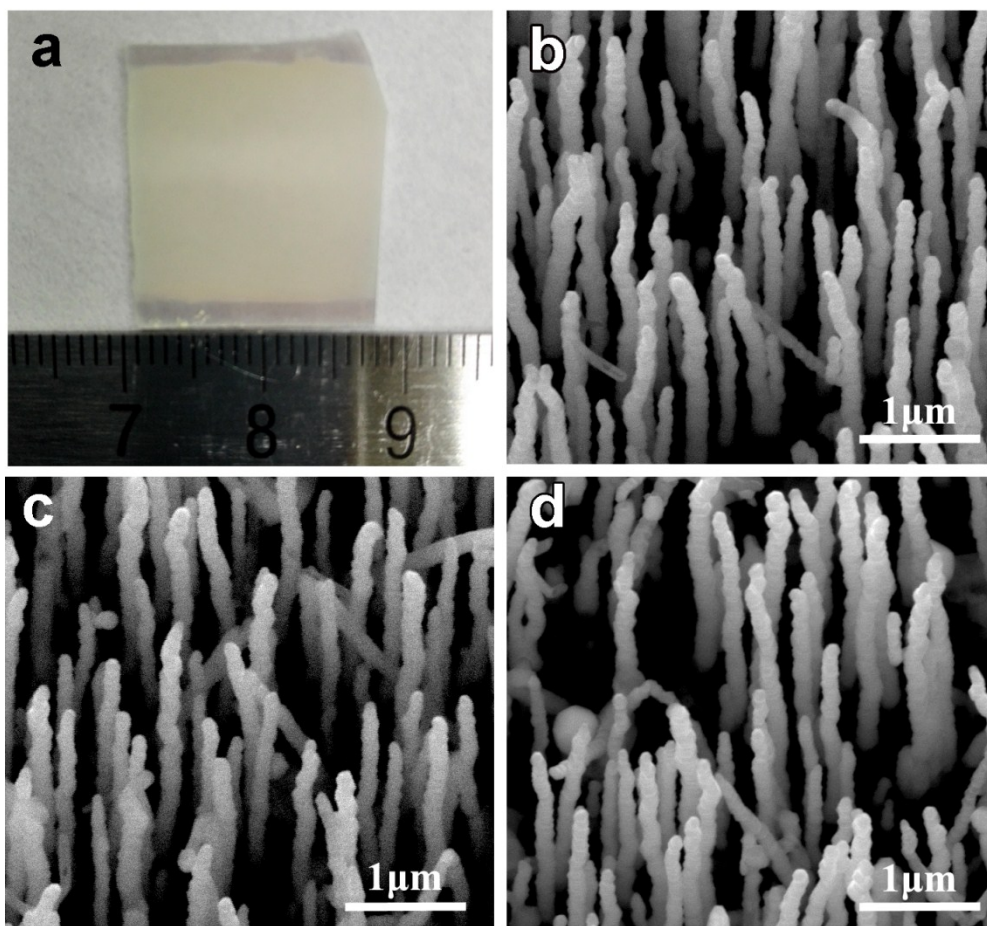

**Figure S2.** (a) Photograph of the well-aligned GaN nanowires grown on a 20\*20 mm sapphire substrate; (b-d) typical SEM images of three randomly selected areas to show the uniformity of GaN nanowire arrays;

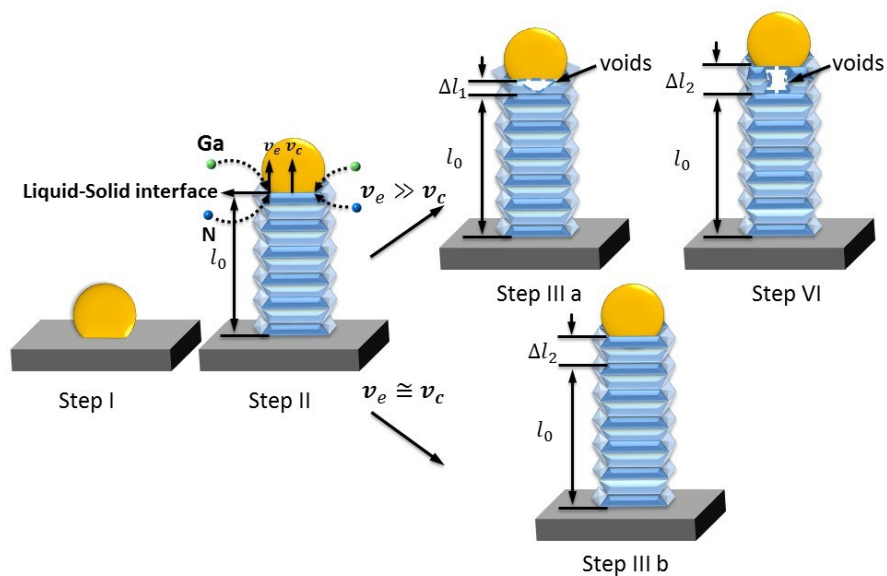

**Figure S3** Schematic diagrams describing the nucleation and catalytic growth of highly-aligned corrugated GaN nanowire arrays and the mechanism of voids formation within the GaN nanowire based on VLS mechanism

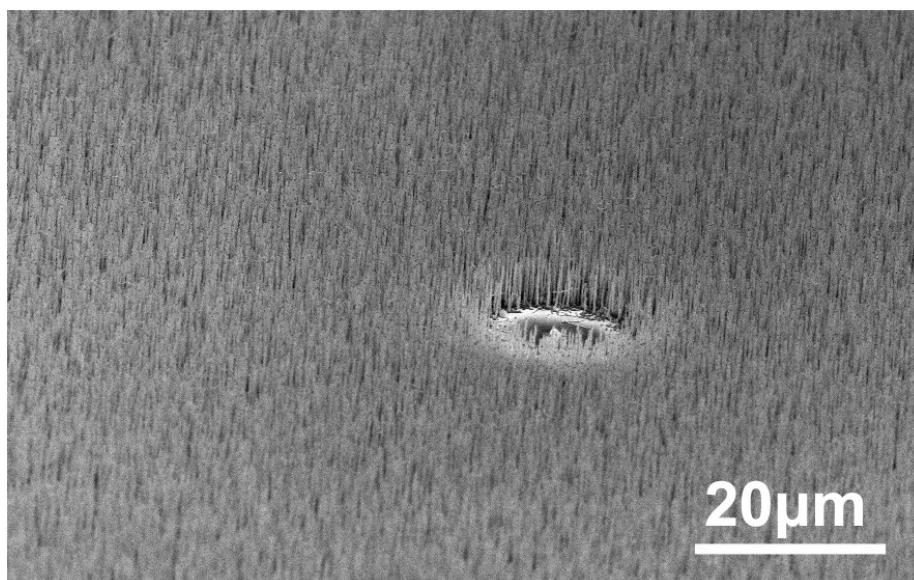

**Figure S4** Low-magnification SEM image of GaN nanowires vertically grown on sapphire substrate; the area without GaN nanowires supports the VLS growth process due to the loss of Au catalyst;

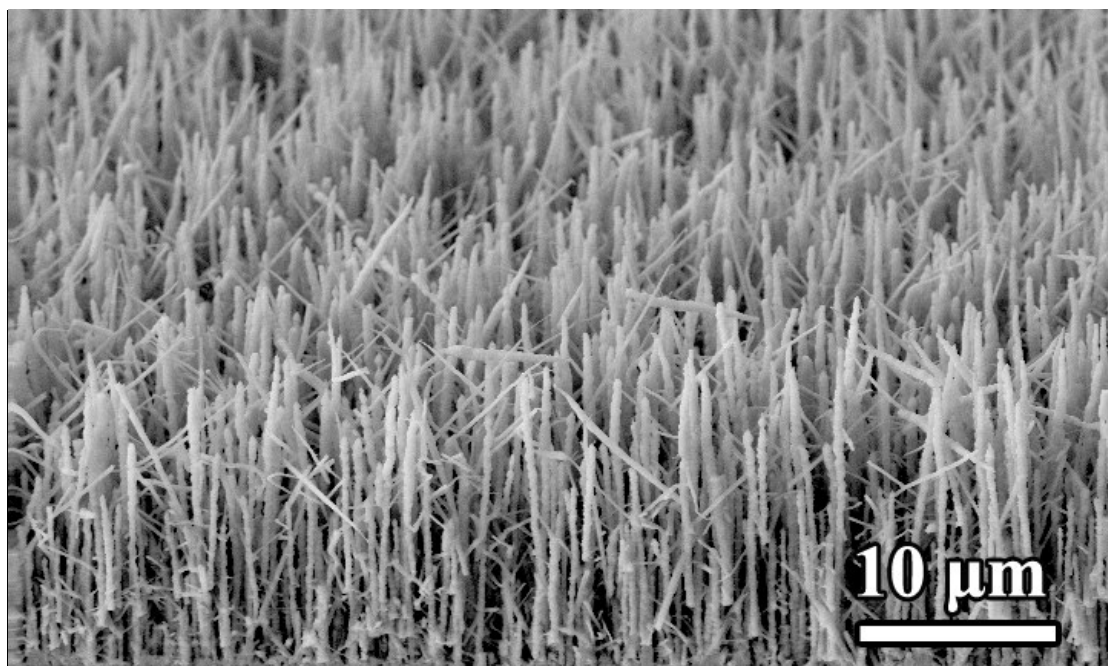

**Figure S5** SEM images of GaN nanowire arrays at the growth temperature at 1150°C

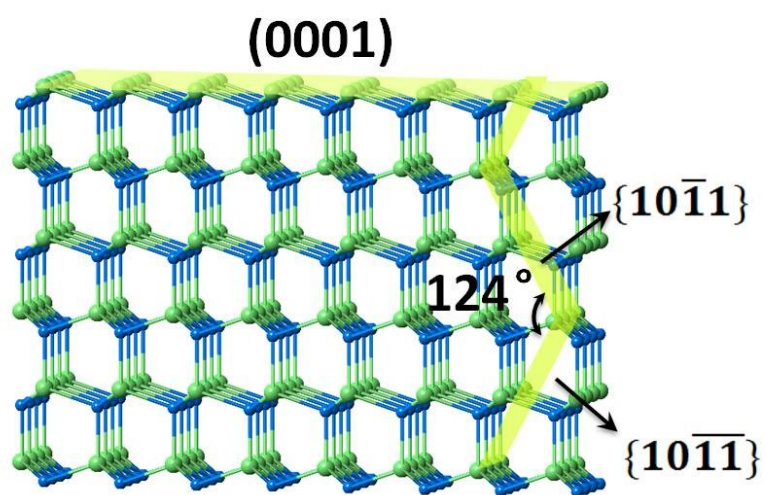

**Figure S6** Atomic model of wurtzite GaN indicating the reciprocal crystalline  $\{10\bar{1}1\}$  and  $\{1011\}$  planes and their intersection angle

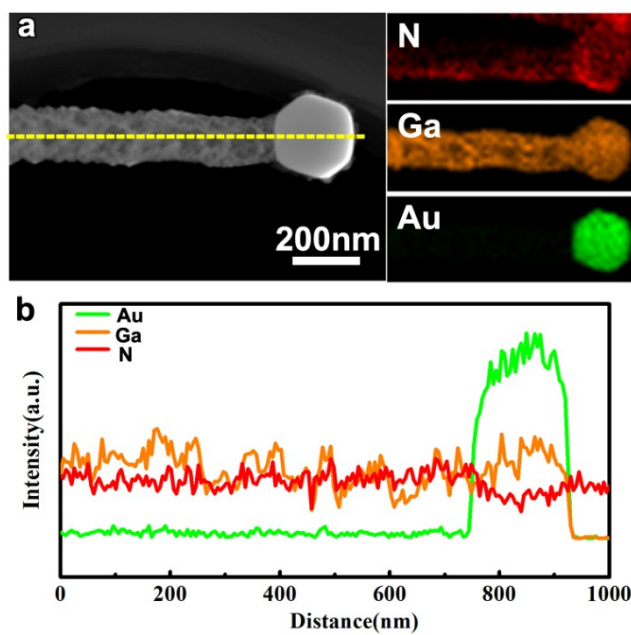

**Figure S7** (a) STEM image of an individual epitaxially grown GaN nanowire and its elemental mapping of Ga, N and Au; (b) the corresponding line-scan elemental profiles taken along the axial direction;
